# Supplementary material
Source: PubMed Central journal article supplement (PMC3675819)
Supplement: supp_M112.026161_mcp.M112.026161-1.pdf [file supp_M112.026161_mcp.M112.026161-1.pdf]

**Fig. S1**

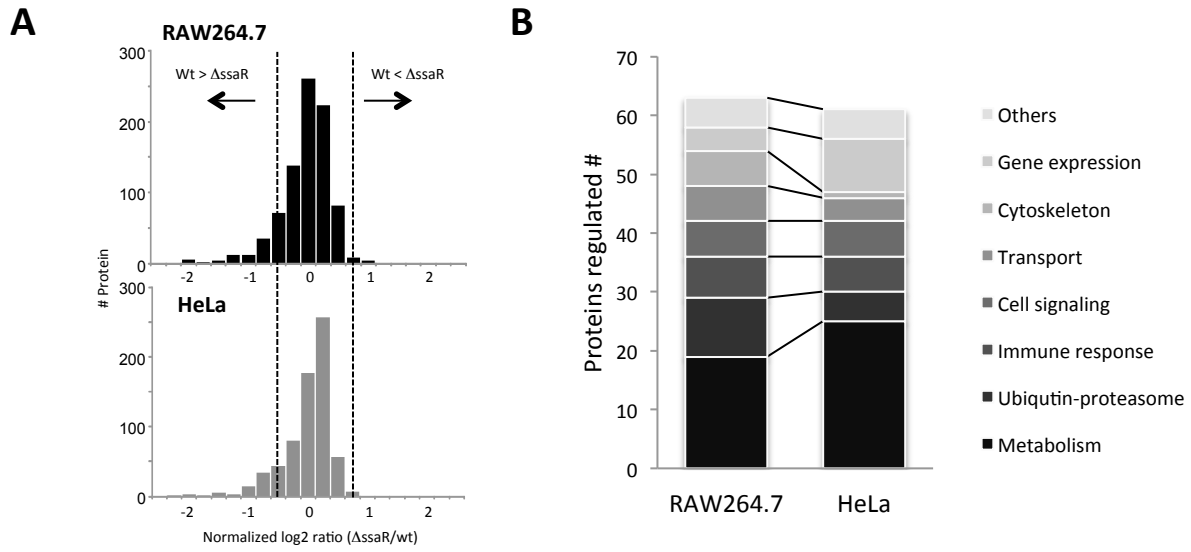

**Fig. S1. Quantitative proteome profiling.** (A) Histograms of log<sub>2</sub>-transformed SILAC ratios for all proteins quantified from RAW264.7 (black) and HeLa (grey). (B) Functional classification of the regulated RAW264.7 proteins (n=63) and HeLa proteins (n=61) based on UniProtKB annotation.

Fig. S2

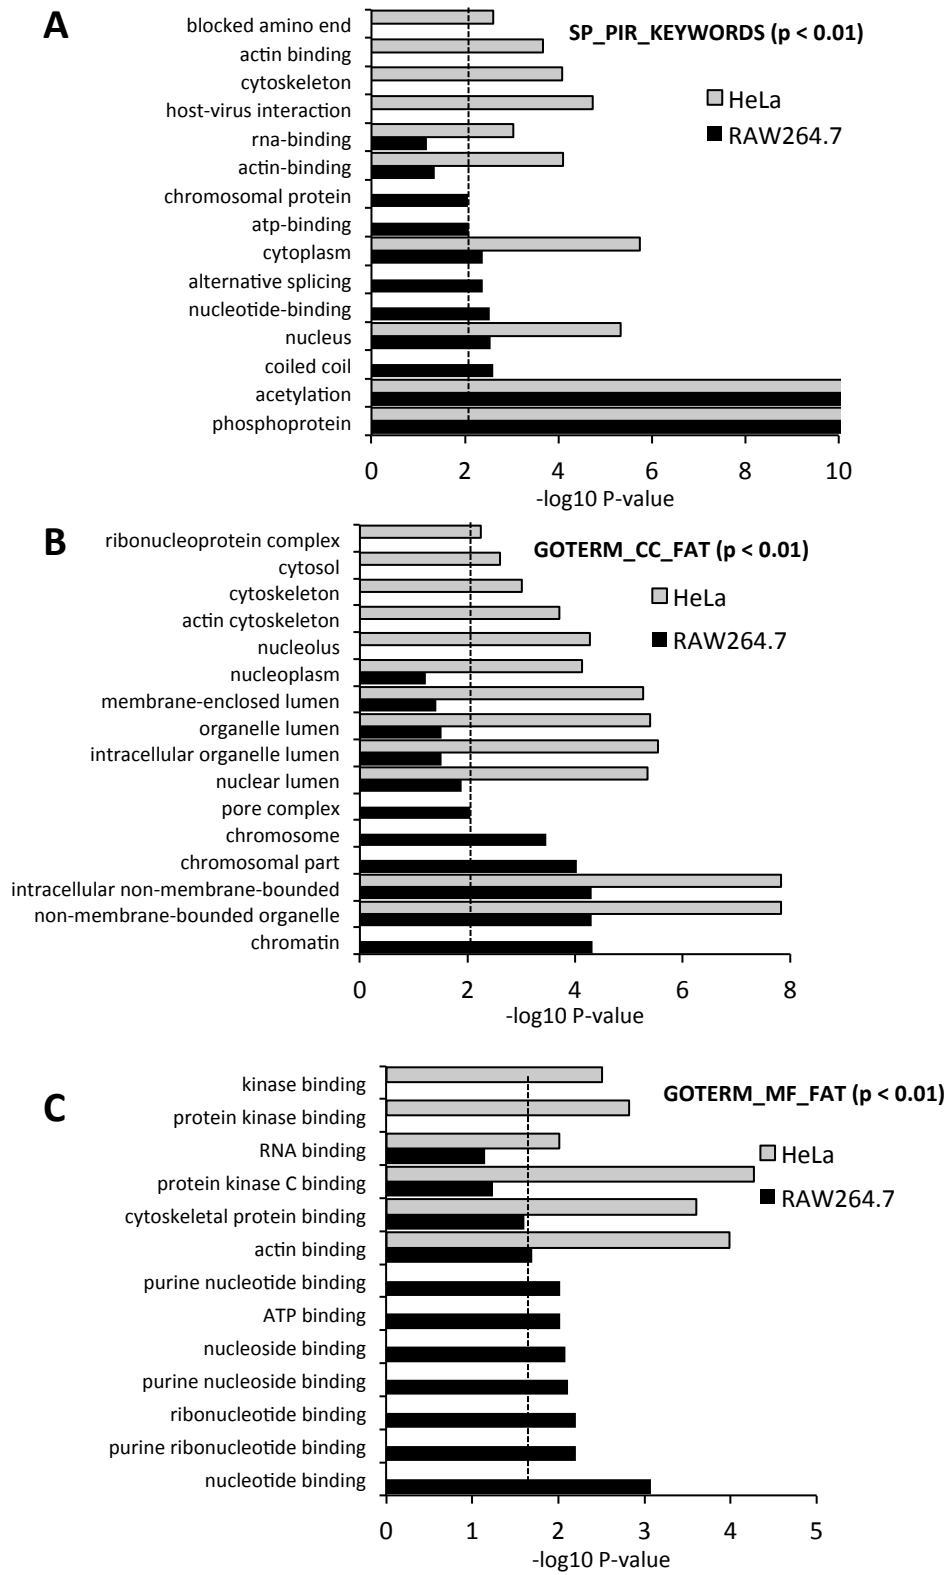

Fig. S2. Enriched GO terms and pathways. (A-C) Logarithmized corrected  $p$ -values (dash line,  $p < 0.01$ ) are shown. Other results are shown in Fig. 2.

**Fig. S3**

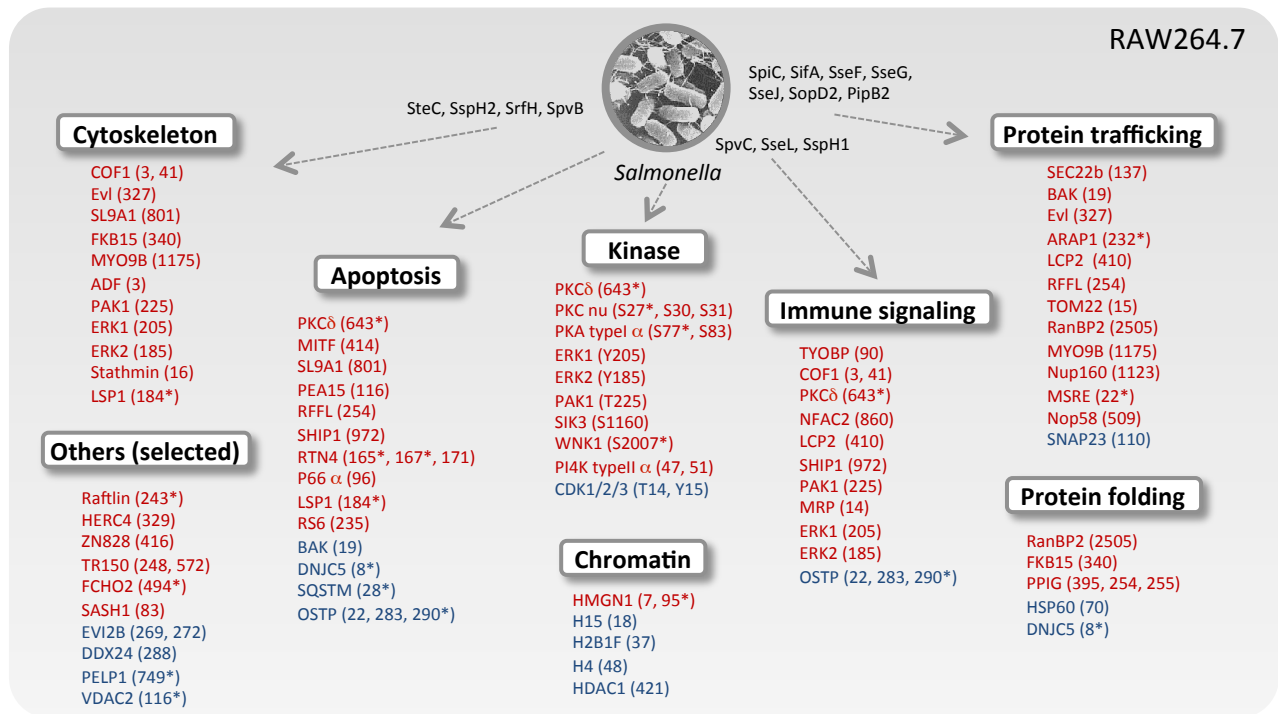

**Fig. S3. Overview of RAW264.7 proteins (phosphorylation site) and cellular processes modulated by SPI2 effectors.** Red or blue represent increased phosphorylation in wt *Salmonella* or in  $\Delta$ ssaR *Salmonella*, respectively.

Fig. S4

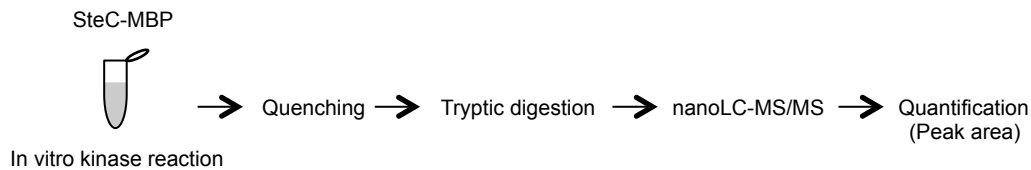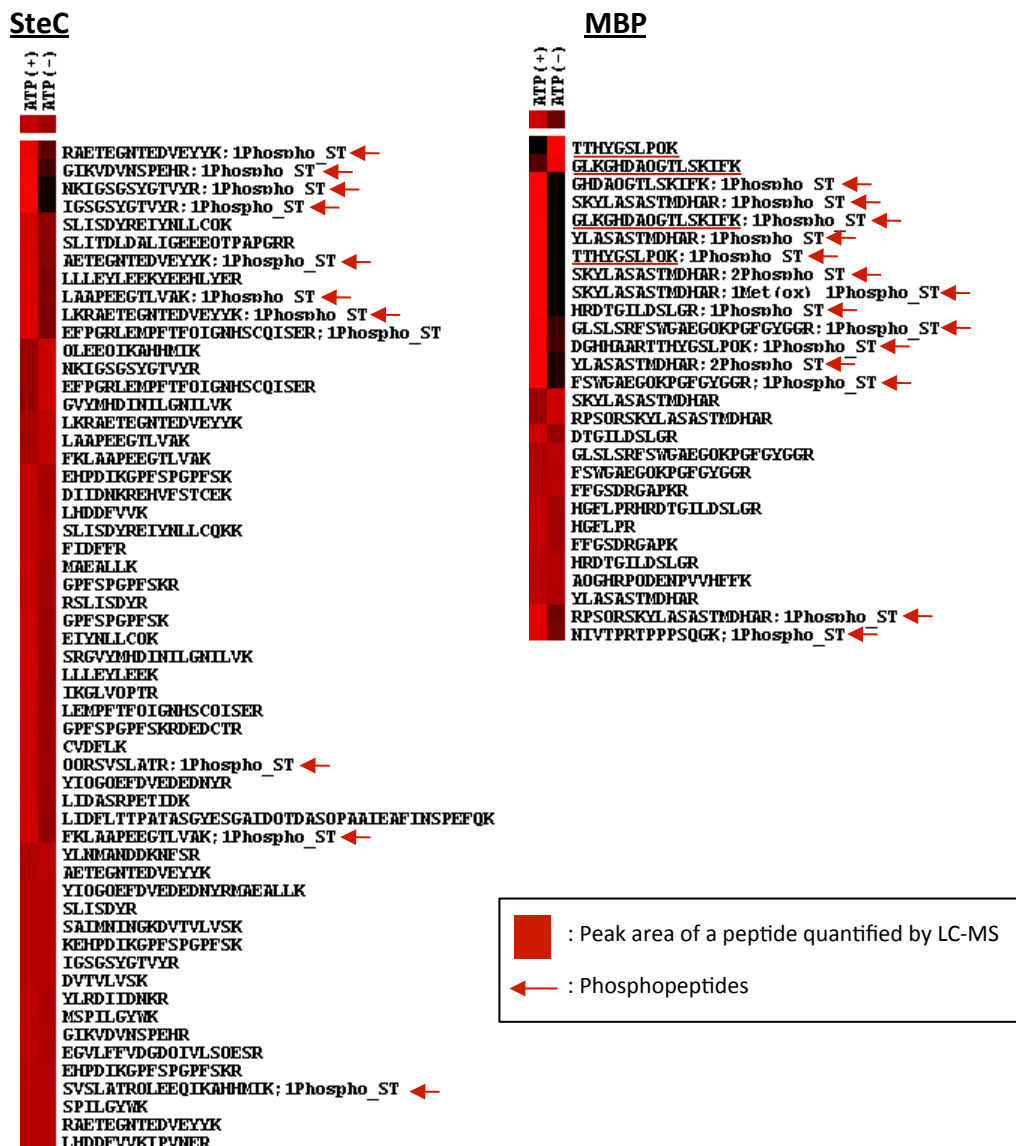

Fig. S4 LC-MS analysis of the tryptic digest of SteC and MBP after in vitro kinase assay (with or without ATP).

# Fig. S5

Phospho site: S9  
 Sequence: RVPFSLLR, S5-Phospho (79.96633 Da)  
 Charge: +2, Monoisotopic m/z: 534.29156 Da (-0.17 mmu/-0.32 ppm), IonScore:26

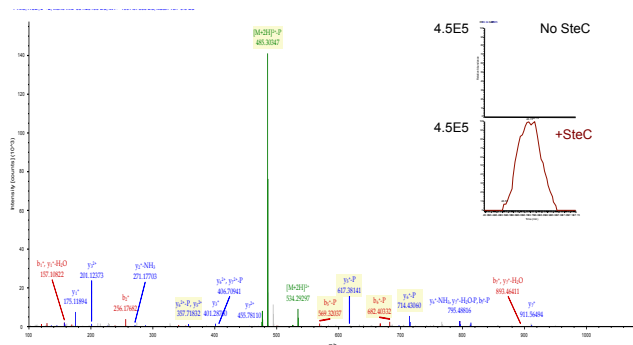

Phospho site: S15  
 Sequence: GPSWDPFDRWYPHSR, S3-Phospho (79.96633 Da)  
 Charge: +3, Monoisotopic m/z: 661.61578 Da (-0.22 mmu/-0.33 ppm), IonScore:30

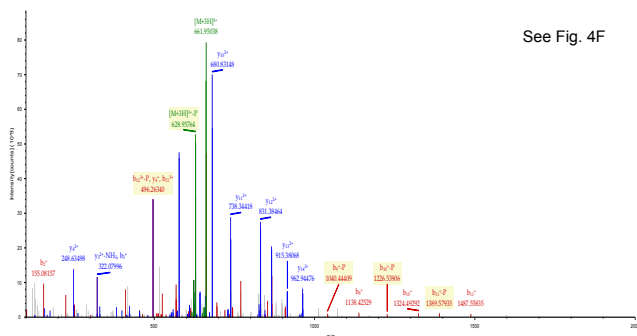

See Fig. 4F

Phospho site: S43/S49/S50/Y54  
 Sequence: LPEEWSQWLGGSSWPGYVRPLPPAAIESPAVAAPAYSR, S13/S6/S12/ Y17-Phospho (79.96633 Da)  
 Charge: +3, Monoisotopic m/z: 1391.67871 Da (-1.87 mmu/-1.34 ppm), IonScore:80

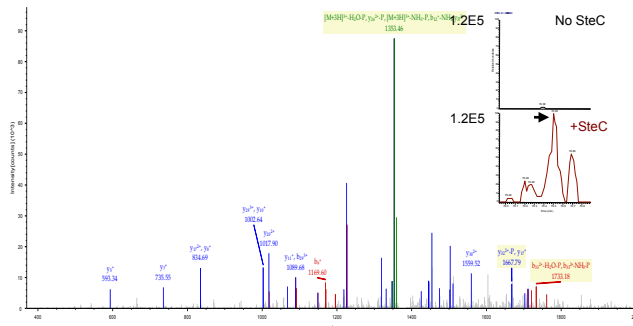

Phospho site: S82  
 Sequence: QLSSGVSEIR, S3-Phospho (79.96633 Da)  
 Charge: +2, Monoisotopic m/z: 578.27393 Da (-0.01 mmu/-0.02 ppm), IonScore:73

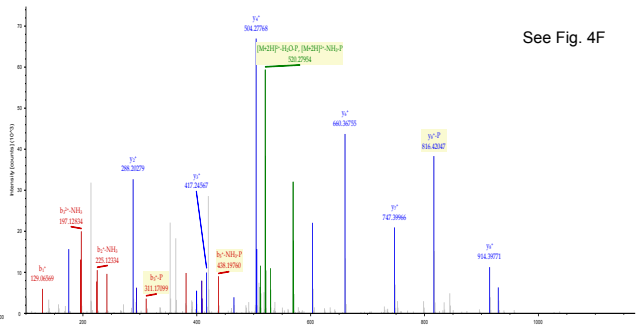

See Fig. 4F

Phospho site: T174 /S176  
 Sequence: LATQSNEITIPVTFESR, T3/S5-Phospho (79.96633 Da)  
 Charge: +2, Monoisotopic m/z: 993.48315 Da (+0.5 mmu/+0.5 ppm), IonScore:35

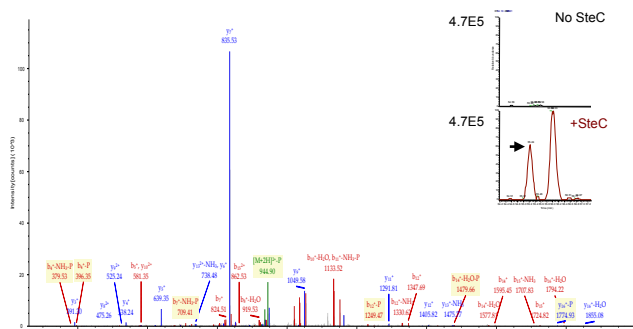

Phospho site: S199  
 Sequence: AQLGGPEAAKSDETAAK, S11-Phospho (79.96633 Da)  
 Charge: +3, Monoisotopic m/z: 575.26794 Da (-0.22 mmu/-0.38 ppm), IonScore:39

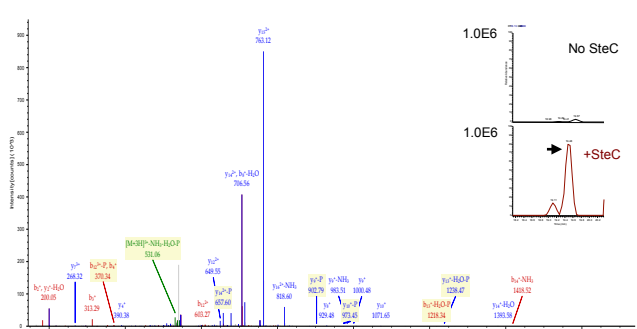

Fig. S5. MS/MS spectra of phosphopeptides identified in human HSP27 from *in vitro* kinase assay.

**Fig. S6**

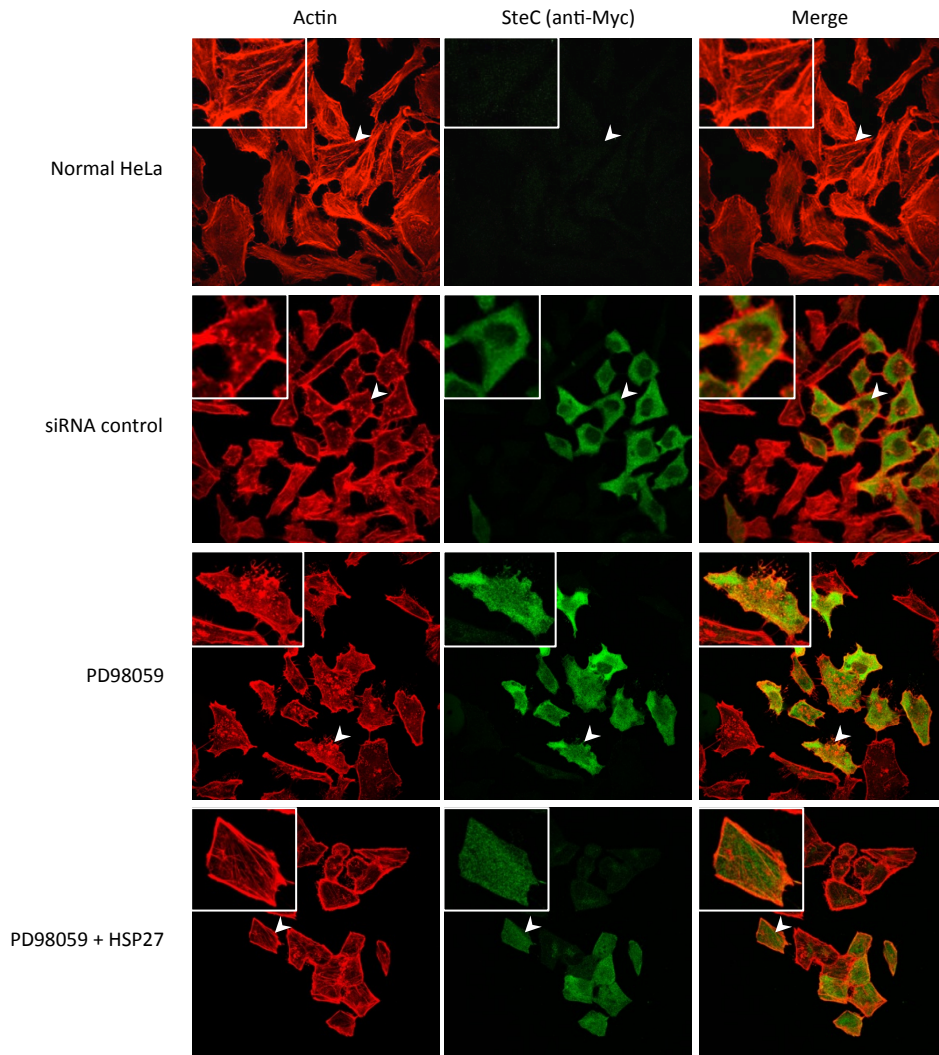

**Fig. S6.** Representative images of the other conditions presented in Fig.5 panel B.
